# Supplementary material
Source: PubMed Central journal article supplement (PMC4815302)
Supplement: PRO-25-046-s006.pdf [file PRO-25-046-s006.pdf]

Supplemental Table 1.

| K <sub>D</sub> and binding half-life (t <sub>1/2</sub> ) to HIV-1 RT for aptamers                                                                                                                                                                        |                                       |                                          |
|----------------------------------------------------------------------------------------------------------------------------------------------------------------------------------------------------------------------------------------------------------|---------------------------------------|------------------------------------------|
| <b>Aptamer</b>                                                                                                                                                                                                                                           | <b><sup>1</sup>K<sub>D</sub> (pM)</b> | <b><sup>1</sup>t<sub>1/2</sub> (min)</b> |
| 38NTSELEX                                                                                                                                                                                                                                                | 163 ± 24                              | 47 ± 4                                   |
| 38NT2,4methyl                                                                                                                                                                                                                                            | 13.7 ± 1.8                            | 126 ± 54                                 |
| <sup>1</sup> Equilibrium dissociation constant (K <sub>D</sub> ) and binding half-life (t <sub>1/2</sub> ) were measured by nitrocellulose filter binding as described in Methods. Values are average of three or more experiments ± standard deviation. |                                       |                                          |
